# Supplementary material for: Intercomparisons of five ocean particle tracking software packages
Source: Copernicus journal article supplement (doi:10.5194/gmd-2023-45), 2023-05-22
Supplement: Supplementary file [file gmd-2023-45-AC3-supplement.pdf]

## GMD-2023-45 Response to Reviewers

We appreciate the time and efforts one anonymous reviewer and Dr. Tor Nordam dedicated to providing feedback on our manuscript. We have incorporated or responded to all the comments and suggestions made by the reviewers. Please see below, in blue, for a point-by-point response to the reviewers' comments and concerns. The line numbers refer to the tracked version of our manuscript.

### **Reviewer 1:**

Review of "Intercomparisons of five ocean particle tracking software packages" by Xiong and MacCready

In this manuscript, the authors present a new particle tracking code and compare it to three existing offline codes, one online code, and an online dye simulation. They focus on two regional domains on the west coast of the US. They show that the new code compares well in terms of accuracy and efficiency.

The manuscript is generally well-written. However, I have some significant concerns that prevent me from recommending its publication in GMD. Most importantly:

1. It is unclear what this new Lagrangian tracking code adds. What is the advantage of the new code over the previous codes? What does it add/improve on the other codes? That could be much more explicit.

Response: we thank the reviewer for the suggestion and apologize for the lack of clarity. In this study, we introduced a new offline particle tracking code Tracker and evaluated its performance with other offline and online tracking codes and passive dye. The main purpose is to conduct the intercomparisons of some commonly used codes in the same numerical simulations to explore the net effect of the many slightly different choices made by the different developers. The other offline tracking codes have already been rigorously tested by their developers, and we present our own tests of vertical mixing for Tracker. When choosing a particle tracking code to use, modelers have many considerations. Will the code be easy to use with their model output? Will they be able to modify the code for their specific needs, e.g., introducing vertical behavior? Will it run fast enough? Finally, a modeler should have some confidence that regardless of which code they choose the results will be reasonably similar for all the choices. The goal of this intercomparison is primarily to address this final issue of confidence, and to discuss some of the other tradeoffs. We have endeavored to clarify this in the revised manuscript. We now explicitly describe our goal in Introduction (lines 93-100) and also add more details on the implementation of Tracker in Methods (lines 113-152).

2. The title is far too general, and suggests a much wider scope than that the manuscript can deliver. It's therefore not appropriate for this specific manuscript.

Response: thanks for the suggestion. We revised the title to “Intercomparisons of five ocean particle tracking software packages in the Regional Ocean Modeling System” to be more specific.

3. It's not at all clear why the LiveOcean and Hood Canal are such good testcases for Lagrangian models. I would have expected a much more thorough discussion of why these are specifically suited. Now, it seems as if the authors had these models lying around and decided to do the comparison; instead of selecting an optimal case for the comparison.

Response: the motivation of the present study for particle tracking code intercomparison stems from the authors' research need to decide which particle code to use for our own ROMS model analysis. During our experiments, we found several open-accessed particle tracking codes could be used but some code like Parcels required re-gridding of the original velocity fields, which requires extra work and will likely introduce some errors in re-gridding. Thus, we limited our comparisons among those codes that can directly operate on ROMS native velocity outputs. As suggested above, we revised the title to be specific to the ROMS model. Given that there is a considerable user group for ROMS and particle tracking is a very useful tool in oceanography, we thought our work of intercomparison could be useful to some part of the research community.

The LiveOcean domain includes deep open ocean, continental slope and shelf, and an inland fjord-type estuary with dynamic sills and quiet deep basins, providing diverse environments to test the preservation of the vertical well mixed condition. The saved LiveOcean model output database (2017-present) is convenient to test the offline particle codes but to do online particle tracking and dye experiment, we found it is more practical to implement them in a small model domain (will be explained more in comment 8).

The reviewer is correct in surmising that we “had these models lying around” and this clearly influenced our choice of experiments. While we did our best to select times and places in the models that we felt covered a useful range of parameter space for the coastal and fjordal ocean, there are clearly many cases we did not test, for example shallow intertidal areas with wetting and drying, river plume fronts, and so on. The “optimal case” for such a comparison is likely to be different for different modelers, hence the definition of globally optimal test cases would involve a much larger number of experiments than we could undertake.

4. It's unclear why some of the choices for the tracker code have been made. E.g., why does it employ nearest neighbour interpolation? That is not very customary for Lagrangian codes. And why then also use 4th order Runge-Kutta integration? Why aim for such high accuracy in time, when spatial accuracy is low?

Response: during the development of Tracker, we tested nearest neighbor and bilinear interpolation and found these two methods gave very similar results but nearest neighbor speeds up the computation in our large model grids. We also tested 2<sup>nd</sup>-order Runge-Kutta integration and found that a higher-order integrator is required to move particles forward in regions with complex shoreline geometries, like the curving channels in the Tacoma Narrow (in the southern Salish Sea). We justified our choice of nearest neighbor interpolation and 4<sup>th</sup>-order Runge-Kutta integration in lines 140-144.

5. The argument for smoothing the AK\_s diffusivity field is unclear; what is the advantage of this?

Response: we added the argument for smoothing the vertical diffusivity in lines 132-133. Smoothing the vertical diffusivity can reduce the potential sharp gradients in vertical diffusivity that could cause particle aggregations (North et al., 2006).

North, E. W., Hood, R. R., Chao, S. Y., Sanford, L. P.: Using a random displacement model to simulate turbulent particle motion in a baroclinic frontal zone: A new implementation scheme and model performance tests. *J. Mar. Syst.*, 60(3-4), 365-380, <https://doi.org/10.1016/j.jmarsys.2005.08.003>, 2006.

6. The discussion of the Well mixed condition test in section 2.1.1 could be more elaborate. What is the equation that is tested. Why? How is e.g. the non-significant range defined in Figure 2?

Response: thanks for the suggestion. We added more descriptions about the vertical well mixed condition tests in lines 157-186.

7. One of the most difficulty things to do for Lagrangian codes is boundary conditions near land, and avoiding stuck particles. While the strategies of each code is listed in table 1, there is no discussion of how well the tracker code performs near boundaries. This would be important information for potential users, especially in domains like the Hood Canal where there is so complicated topography.

Response: in Tracker, if a particle gets onto land, it will be moved to a neighboring grid cell with a random direction (please see line 471 in <https://github.com/parkermac/LO/blob/v1.1/tracker/trackfun.py>). The numerical model does not resolve every process in the nearshore region (waves, rip currents, and so on), therefore, this is a practical way to make sure that particles do not get caught in the boundaries or in corners. We added these details in lines 149-152.

8. Why is there no comparison to online floats or dye in the LiveOcean domain of figure 6 and 7? For a complete picture, that would be useful here too.

Response: we thank the reviewer for this suggestion and tried to run online dye and particle in the LiveOcean domain. However, this requires recompiling and rerunning the model. The version of the model used for the LiveOcean domain used a somewhat dated version of ROMS (the Hood Canal model, and the current LiveOcean forecast use an up-to-date version). The result is that it would be a great deal of work, and significant computational effort, to re-run the LiveOcean model with dye.

While we agree that your suggestion would give a more complete picture, we are motivated by the difficulty of accomplishing it to explore whether it is necessary. We see no reason why intercomparisons between offline particle tracking and online particle tracking/dye experiments in the large LiveOcean domain would give significantly different information than that from intercomparisons among them in the small Hood Canal domain, i.e., that offline particle tracking performs as well as the online tracking. Our attempt here to rerun the large LiveOcean model

could also be an example why offline particle tracking is more popular than online tracking in applications. Some studies that applied offline tracking can easily use the precalculated velocity fields without the necessity of rerunning the hydrodynamic model, for example, a recent study using offline particles and the global model ECCOv4 to investigate the global overturning circulation (Rousselet et al., 2021). They may not have the resources available to rerun the model.

Rousselet, L., Cessi, P., Forget, G. (2021). Coupling of the mid-depth and abyssal components of the global overturning circulation according to a state estimate. *Science Advances*, 7(21), eabf5478.

Other minor comments:

- line 9: Make explicit that these numbers (200m and 1000m) are the resolution and not the domain sizes)

Response: thanks for the suggestion. We deleted these two numbers in the abstract to avoid confusion. The small Hood Canal model domain has a uniform horizontal resolution of 200 m but the large LiveOcean model domain has a changing horizontal resolution from 500 m to 3000 m. In the coastal area of LiveOcean model, in which we conducted the particle tracking experiments, the grid resolution is 1000 m.

- line 15: This sentence is very vague; please rephrase in terms of conclusions/outcomes

Response: We edited this sentence lightly for clarity (lines 14-18), but were unable to boil the “tradeoffs” down to the level of conclusions. This is because the conclusion is really a user’s choice based on how the tradeoffs affect their particular model and research needs.

- line 26: Explain why offline tracking is more frequently applied?

Response: we added the explanation in lines 29-31.

- Line 35: There are some recent articles that compare different tracking codes in e.g. the Agulhas: <https://agupubs.onlinelibrary.wiley.com/doi/full/10.1029/2019JC015753>

Response: thanks for pointing out this reference and we added it in line 49.

- line 38: what is meant here with performance? Speed? Memory? I/O? Accuracy? Reproducibility?

Response: revised in line 53.

- line 40: Is LiveOcean really 'well-established'? What does that even mean, when it comes from the developers of the model?

Response: we apologize for the unclear description and have added the development and calibrations of LiveOcean in lines 61-64.

- line 127: 'studied' instead of 'studies'

Response: revised.

- line 145: what was the convenience why the seeding strategy was different for the online particles?

Response: in the online particle experiment, all  $10^5$  particles were released inside the same model grid cell as other offline particle codes. Rather than specifying a particle distribution of  $100 \times 100 \times 10$  (longitude, latitude, vertical) inside the selected grid cell, which is easily to do in the offline codes, it requires significant coding to define a particle distribution of  $100 \times 100 \times 10$  in ROMS's online tracking file, floats.in. Therefore, we slightly adjusted the seeding strategy and specified the particles' location uniformly along the diagonal of the grid cell, which only requires 1 line of code (an example shown below). This implementation gives the same location of mass center in x, y, and z direction as other offline codes. In addition, the vertical thickness of the selected grid cell is 8.7m, about 5% of the total water depth in this location (~170m). These two release strategies should not induce significant difference to the intercomparison. We added the explanations in lines 230-232.

```
58 ! Number of floats to release in each nested grid. These values are
59 ! essential because the FLOATS structure in "mod_floats" is dynamically
60 ! allocated using these values, [1:Ngrids].
61
62     NFLOATS == 100000
63
64 ! Initial floats locations for all grids:
65 !
66 !   G      Nested grid number
67 !   C      Initial horizontal coordinate type (0: grid units, 1: spherical)
68 !   T      Float trajectory type (1: Lagrangian, 2: isobaric, 3: Geopotential)
69 !   N      Number floats to be released at (Fx0,Fy0,Fz0)
70 !   Ft0    Float release time (days) after model initialization
71 !   Fx0    Initial float X-location (grid units or longitude)
72 !   Fy0    Initial float Y-location (grid units or latitude)
73 !   Fz0    Initial float Z-location (grid units or depth)
74 !   Fdt    Float cluster release time interval (days)
75 !   Fdx    Float cluster X-distribution parameter
76 !   Fdy    Float cluster Y-distribution parameter
77 !   Fdz    Float cluster Z-distribution parameter
78
79 POS = G, C, T, N, Ft0, Fx0, Fy0, Fz0, Fdt, Fdx, Fdy, Fdz
80
81     1 1 1 100000 0.d0 -123.0008327d0 47.5657658d0 -85.281616d0 0.d0 2.673387e-08 1.8018018e-08 8.738766e-05
```

- line 209: The point that dye spreads faster than Lagrangian particles is not new, and could be related to Markovian dynamics (I.e. dye that enters a grid cell from one side can leave it on the other side within a timestep)?

Response: thanks for pointing it out and we added references (lines 302-303) that observed the same faster dye spreading in their comparisons between dye and Lagrangian particles. For Markovian dynamics, this is an interesting topic, we assume it's related to the advection scheme of dye. Could you point us to the reference? Additionally, numerical mixing was found to account for one-third of the total mixing of salinity in the LiveOcean Model inside the Salish Sea (Broatch and MacCready, 2022), which can also contribute to the faster spreading of dye than Lagrangian particles, especially in regions with strong horizontal gradients.

Broatch, E. M., MacCready, P.: Mixing in a Salinity Variance Budget of the Salish Sea is Controlled by River Flow. *J. Phys. Oceanogr.*, 52(10), 2305-2323.  
<https://doi.org/10.1175/JPO-D-21-0227.1>, 2022.

- line 256: 'growing differences in location' is slightly awkward phrasing?  
Response: revised (line 362)

- line 278: is the laptop the same as the Apple M1 Pro?  
Response: Yes, and we revised it to “Apple M1 Pro” to make it clear (line 386).

- line 284: why does LTRANS scale so poorly for large numbers of particles? This is very surprising for a Fortran code?

Response: to be honest, we don't know the exact answer. Based on our experiments, LTRANS runs very fast with small numbers of particles but slows down a lot when tracking a large number of particles. It could be due to the algorithm structures, but it is beyond the scope of this paper. Here we hope the computation time may be one piece of information scientists can use when choosing a particle tracking package and designing an experiment.
